# Supplementary material for: Silibinin Overcomes EMT-Driven Lung Cancer Resistance to New-Generation ALK Inhibitors
Source: MDPI journal article supplement (doi:10.3390/cancers14246101), 2022-12-11
Supplement: s1 [file s1]

**Silibinin overcomes EMT-driven  
lung cancer resistance to new-generation ALK inhibitors**

**SUPPLEMENTARY INFORMATION**

**Table S1. Comparison of ALK-TKIs IC<sub>50</sub> values (in μmol/L) in ALK-rearranged NSCLC cells cultured in the absence/presence of SBN**

|                   | <b>H2228</b>     | <b>H2228/CR</b>              | <b>H3122</b>       | <b>H3122/CR</b>    |
|-------------------|------------------|------------------------------|--------------------|--------------------|
| <b>crizotinib</b> | 2.1 ± 0.8 (1.0)  | 10.6 ± 1.7 (1.0)             | 0.29 ± 0.06 (1.0)  | 1.08 ± 0.40 (1.0)  |
| + 100 μmol/L SBN  | 1.3 ± 0.7 (1.6)  | 3.7 ± 0.7 (2.9) <sup>a</sup> | 0.10 ± 0.00 (2.9)  | 0.17 ± 0.03 (6.3)  |
| <b>brigatinib</b> | 0.5 ± 0.08 (1.0) | 3.8 ± 0.4 (1.0)              | 0.02 ± 0.00 (1.0)  | 0.12 ± 0.03 (1.0)  |
| + 100 μmol/L SBN  | 0.4 ± 0.07 (1.2) | 0.6 ± 0.1 (6.3)              | 0.01 ± 0.00 (2.0)  | 0.07 ± 0.01 (1.7)  |
| <b>lorlatinib</b> | 1.0 ± 0.11 (1.0) | 83 ± 5.1 (1.0)               | 0.004 ± 0.00 (1.0) | 0.02 ± 0.00 (1.0)  |
| + 100 μmol/L SBN  | 9.0 ± 2.2 (0.1)  | 19.3 ± 3.2 (4.3)             | 0.004 ± 0.00 (1.0) | 0.003 ± 0.00 (6.7) |

<sup>a</sup> Number in parentheses represent the silibinin (SBN) extent of sensitization expressed as fold-change compared to untreated control cells

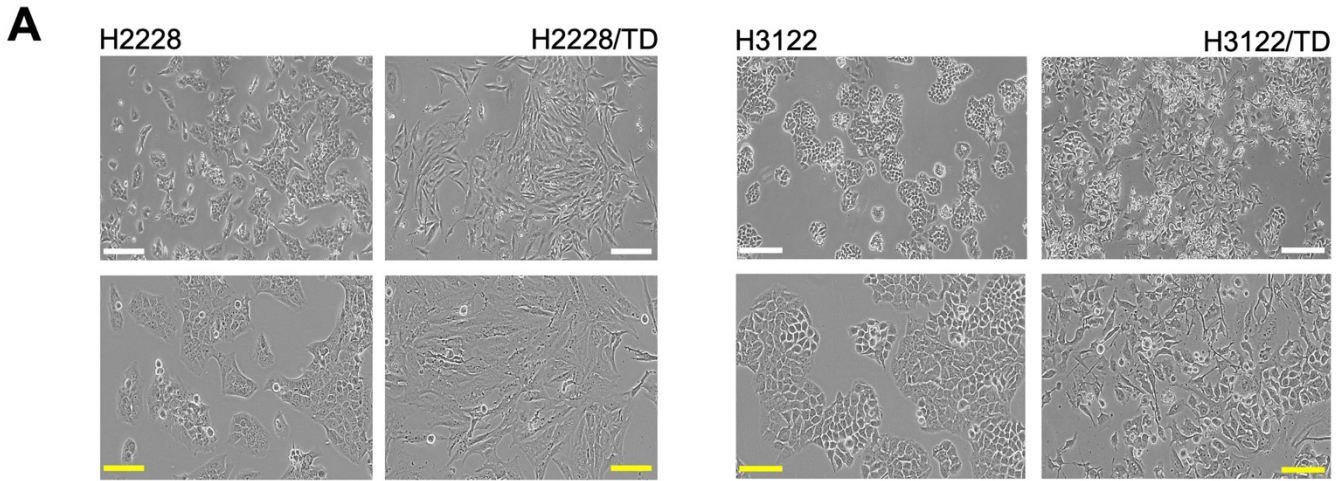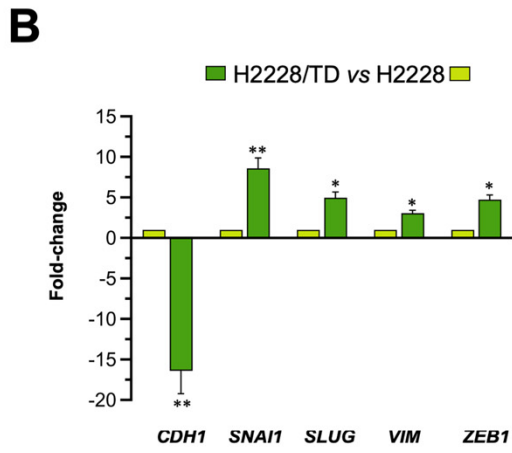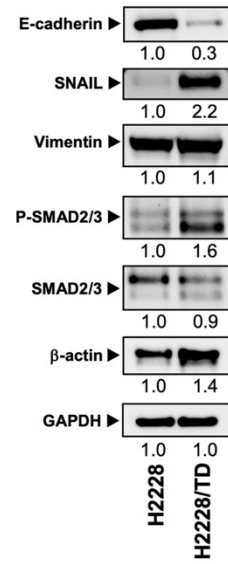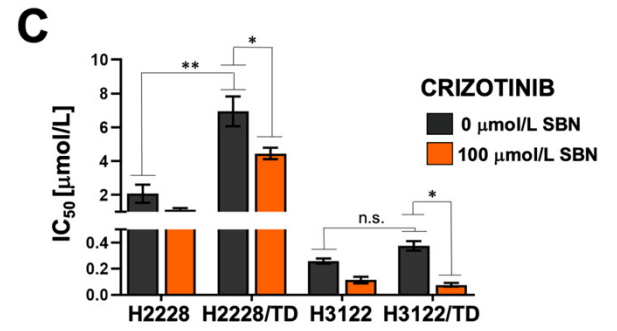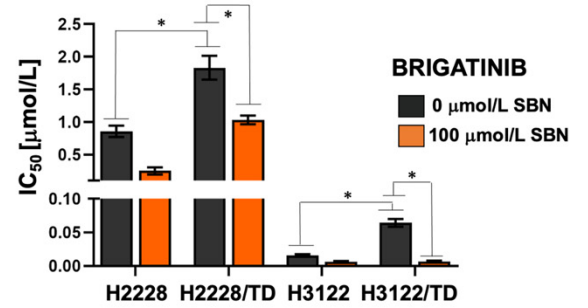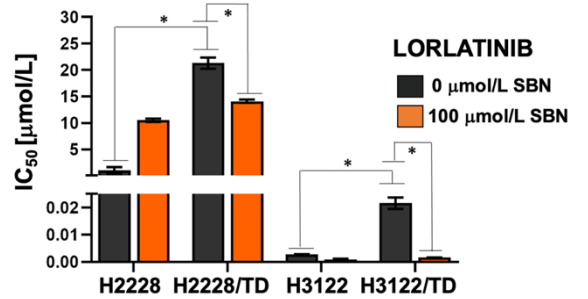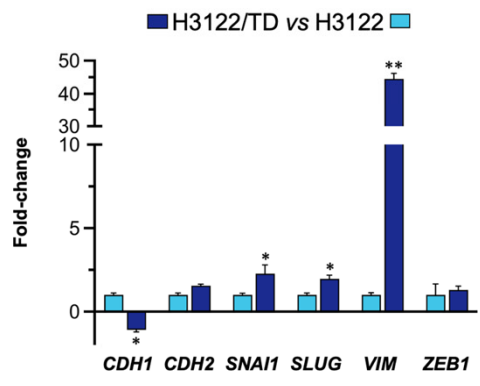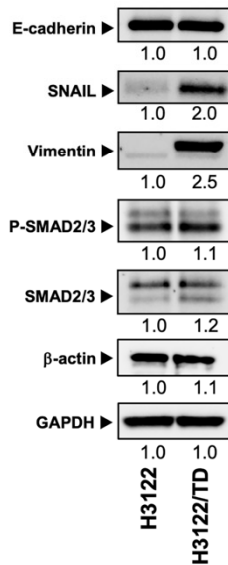

**Figure S1. EMT caused by chronic TGF $\beta$  stimulation drives cross-resistance to multiple-generation ALK-TKIs.** **A.** Representative phase contrast microphotographs of H2228/H2228TD and H3122/H3122TD ALK-rearranged NSCLC cell line pairs. TD: transdifferentiated; Scale bar, 100  $\mu$ m. **B.** *Left.* The transcript abundance of *CDH1*, *CDH2*, *SNAI1*, *SLUG*, *VIM*, and *ZEB1* was calculated using the  $\Delta C_t$  method and presented as fold-change in H2228/H2228TD and H3122/H3122TD cells; \* $p < 0.05$  and \*\* $p < 0.005$ , statistically significant differences. *Right.* Expression levels of E-cadherin, SNAIL, vimentin, phospho-SMAD2/3, total SMAD2/3 were detected by immunoblotting in H2228/H2228TD and H3122/H3122TD cells using specific antibodies. The intensity of the bands was measured using the ImageJ software. Fold-change of each protein relative to parental cells was calculated using GAPDH as a loading control. Figure shows representative immunoblots of multiple ( $n=3$ ) independent experiments. **C.** Bar graphs showing the MTT-based IC<sub>50</sub> values of crizotinib, brigatinib, and lorlatinib for H2228/H2228TD and H3122/H3122TD cells calculated in the absence or presence of 100  $\mu$ mol/L silibinin. The results are presented as the means (*columns*)  $\pm$  S.D (*bars*) ( $n=3$ , in triplicate). \* $p < 0.05$  and \*\* $p < 0.005$ , statistically significant differences; n.s. not significant.

Figure S2. Uncropped western blots

H2228

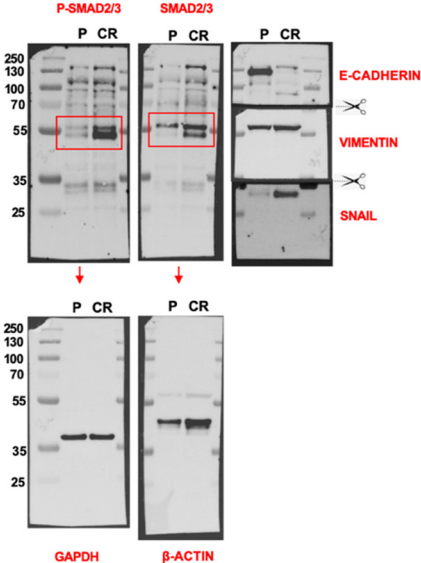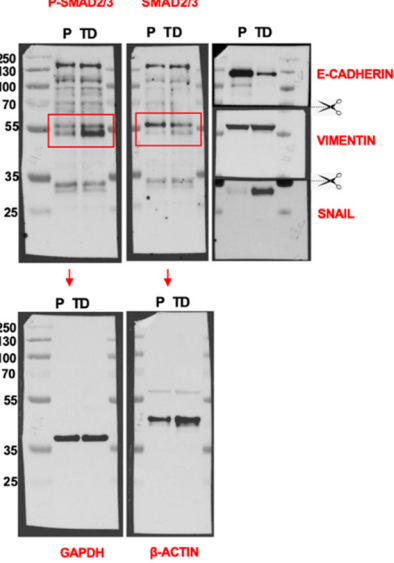

H3122

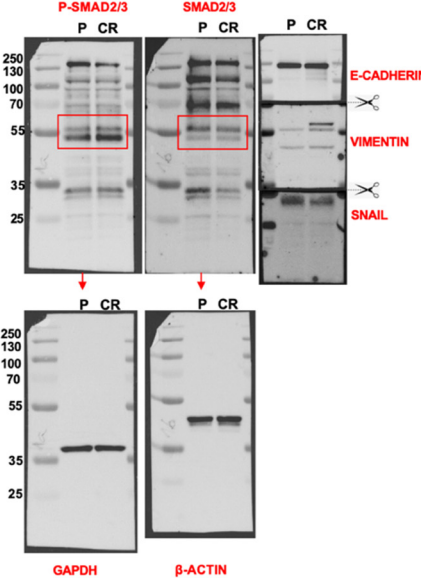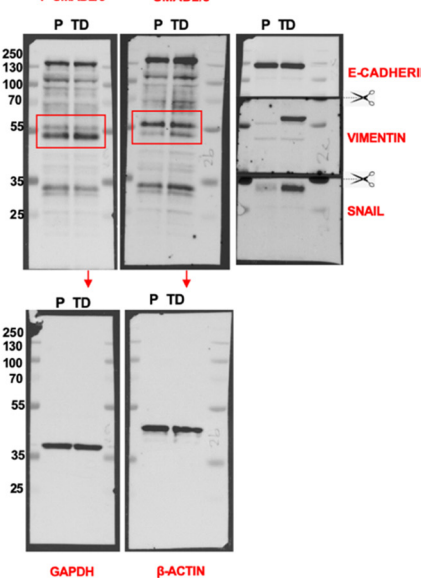

HEK

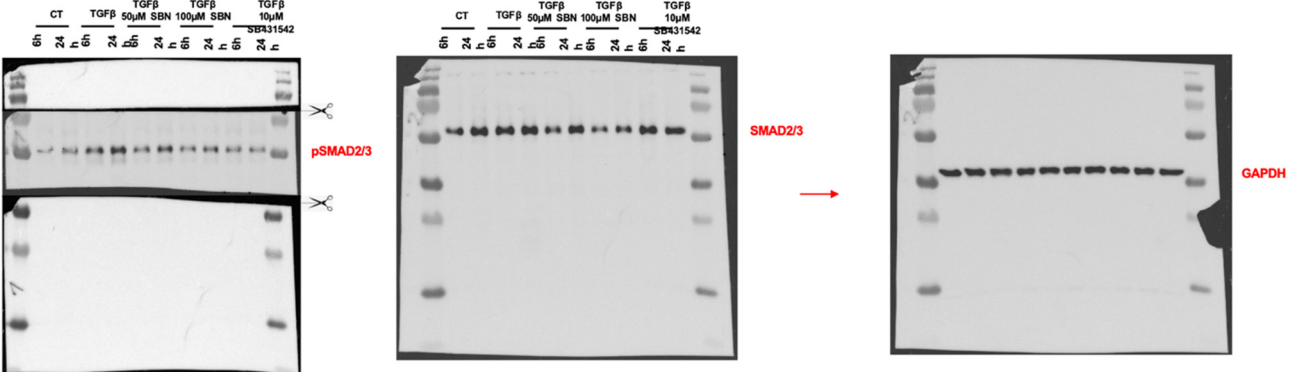

H2228

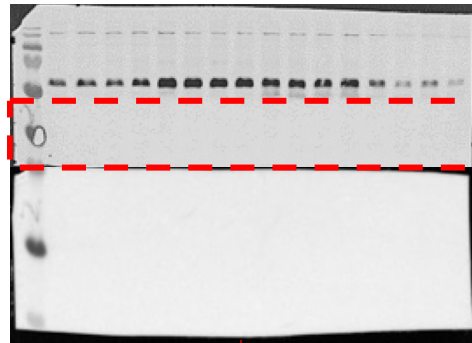

SMAD2/3

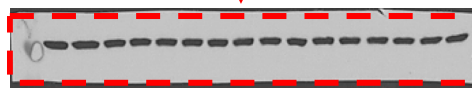

GAPDH

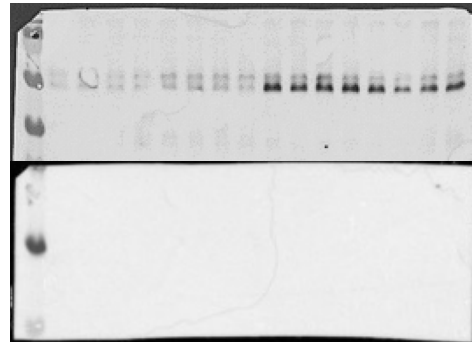

pSMAD2/3

H3122

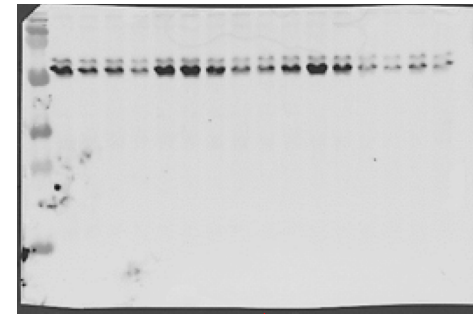

pSMAD2/3

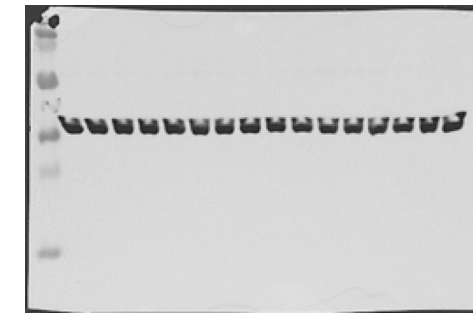

GAPDH

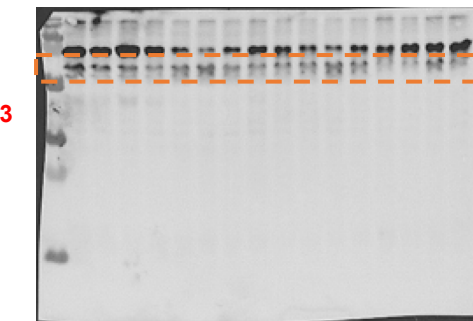

SMAD2/3
